# Supplementary material
Source: ML conference proceedings conference paper supplement (https://openreview.net/forum?id=n-219jrTht)
Supplement: supplementary_material [file attachment]

## Sheet: results
	Stats									|Direct|				|Sufficient|				|Minimal|				#Nec. Features				#Rel. Features				#Sufficient				#Contrastive				|Contrastive|				#Minimal
Data set	#Instances	#Features	#Classes		%A	#N	depth	#B		min	median	max		min	median	max		min	median	max		min	median	max		min	median	max		min	median	max		min	median	max		min	median	max		min	median	max
adult	48842	14	2		81.36	12934	47	2974.8		4	16	42		4	16	36		4	16	36		0	7	22		8	263	543		1	-	≥1,5738357226073E+24		7	201	470		1	4	16		1	3	256
allBooks_baseline_DTM	590	8266	8		72.5424	180.6	42.4	86		2	9	49		2	9	44		2	9	44		1	7	42		2	17.5	50		1	2	72		2	16	46		1	1	6		1	1	32
anneal	898	38	5		98.7753	30.8	7.6	14.9		3	4	8		3	4	7		3	4	7		1	4	7		3	4	13		1	1	10		3	4	9		1	1	4		1	1	4
anneal_2	898	38	2		99.2185	26.4	6.2	12.7		2	4	7		2	4	5		2	4	5		0	4	5		2	4	10		1	1	9		2	4	7		1	1	4		1	1	4
appendicitis	106	7	2		80	24.8	6.9	11.9		2	4	8		2	4	7		2	4	7		1	3	6		3	5	11		1	2	7		3	4	7		1	1	4		1	1	4
arcene	200	10000	2		74.5	25	5.3	12		2	4	6		2	4	6		2	4	6		1	3	6		2	6	11		1	2	9		2	5	8		1	1	5		1	1	8
australian	690	14	2		83.913	159.8	11.9	75.6		3	6	12		3	6	11		3	6	11		0	3	10		5	20	45		1	24	10368		5	15	30		1	2	7		1	2	192
autos	205	25	2		86.8571	44	7.9	21.3		2	5	10		2	5	8		2	5	8		1	3	7		3	9	17		1	4	24		3	7	12		1	2	5		1	2	8
backache	180	32	2		80.5556	46.8	8.1	21.6		2	6	9		2	5	8		2	5	8		0	2	7		2	13	21		1	12	240		2	8	15		1	2	5		1	2	48
balance	625	4	2		85.1306	209.4	10.8	16.6		4	6	11		4	5	8		4	5	8		0	2	6		4	11	17		1	9	89		4	10	27		1	2	7		1	2	27
bank	41188	20	2		88.9871	5523.6	29.6	977.8		8	13	28		8	13	24		8	13	24		0	4	15		23	200	330		23	-	≥7430000000000000000		15	150	277		1	4	13		1	4	168
bank_marketing	45211	16	2		87.3969	6656.4	30.7	1432.6		5	14	21		5	14	21		5	14	21		0	3	16		11	247	398		3	-	≥7,46E+21		9	189.5	337		1	4	13		1	8	432
banknote	1372	4	2		98.6153	51	7.1	25		3	4	7		3	4	7		3	4	7		0	2	5		3	13	27		1	12	629		3	7	14		1	2	6		1	2	48
biodegradation	1055	41	2		81.7978	221.2	16	107.3		3	9	20		3	9	17		3	9	17		0	5	12		3	30	72		1	129	1486800		3	21	47		1	2	8		1	2	48
biomed	209	8	2		90	34	8.6	16.5		1	6	11		1	6	10		1	6	10		0	4	8		1	8	16		1	3	80		1	6	10		1	1	5		1	2	16
breast_cancer	286	9	2		63.67	191.2	16.7	32.5		2	7	20		2	6	16		2	6	16		0	3	14		4	18	26		1	18	356		4	13	24		1	2	6		1	2	18
bupa	345	6	2		59.9832	147.8	11.1	67.1		3	6	12		3	6	11		3	6	11		0	4	9		4	17	48		1	15	15424		4	12	31		1	2	7		1	1	24
car	1728	6	2		99.0741	98	12.3	13.2		1	3	12		1	2	8		1	2	8		0	1	8		1	5	12		1	1	7		1	4	10		1	2	7		1	1	6
cars	406	8	2		92.5976	49.6	8.3	24		2	4	9		2	4	8		2	4	8		0	3	7		2	6	21		1	2	48		2	5	15		1	2	6		1	2	8
christine	5418	1636	2		63.3627	853.2	36.6	426		4	12	47		4	12	47		4	12	47		0	8	41		5	92	202		1	63108.5	2167735434744		5	71	151		1	3	8		1	2	4096
cleveland_nominal	303	7	5		51.4839	188.4	10.9	14.2		3	7	11		3	5	11		3	5	11		0	3	11		3	9	13		1	4	24		3	7	13		1	2	8		1	2	12
cleveland_nominal_2	303	13	2		74.914	93	9.5	39		3	5	10		3	5	9		3	5	9		0	3	7		4	14	28		1	10	230		4	10	19		1	2	6		1	2	12
cnae	1079	856	9		86.0981	276.8	51.3	113.3		1	10	60		1	9	50		1	9	50		0	9	50		1	24	67		1	2	33		1	22	62		1	1	6		1	1	8
colic	368	22	2		75.2928	101.6	11.8	46.6		3	7	12		3	7	12		3	7	12		0	4	10		4	16	34		1	13.5	1500		4	11	21		1	2	6		1	2	216
compas	6172	11	2		65.9758	1230	19.1	46.2		5	11	20		4	6	14		4	6	14		0	3	12		4	16	33		1	16	444		4	13	33		1	2	11		1	2	21
contraceptive	1473	9	3		50.4399	1252.2	22	88.6		2	12	22		2	11	20		2	11	20		0	8	17		2	25	47		1	20.5	4272		2	21	52		1	2	11		1	2	48
corral	160	6	2		100	27	5	5		3	4	5		2	2	2		2	2	2		0	2	2		2	2	5		1	1	2		2	2	4		1	1	4		1	1	4
Default_payement	1200	11	2		66.5833	395.8	17	182.3		3	8	21		3	8	18		3	8	18		0	4	12		4	36	94		1	212	82464990		4	25	60		1	3	10		1	2	36
dermatology	366	34	2		98.6411	8.8	2.9	3.9		2	2	3		2	2	3		2	2	3		0	1	3		2	3	4		1	2	3		2	2	3		1	1	3		1	2	4
dexter	600	20000	2		86.1667	72.4	12.2	35.6		2	6	15		2	6	15		2	6	15		0	5	14		2	16	26		1	4	120		2	13	21		1	2	6		1	1	8
divorce	170	54	2		97.6471	6.8	2.9	2.9		1	2	3		1	2	3		1	2	3		0	2	3		1	3	3		1	1	1		1	2	3		1	1	3		1	1	3
dorothea	1150	100000	2		92	65.2	17.8	32.1		2	17	19		2	17	19		2	17	19		0	16	19		2	18	27		1	2	129		2	17	22		1	1	5		1	1	16
ecoli	336	7	2		92.5936	44.2	7.3	21.4		3	4	7		3	3	6		3	3	6		0	1	6		3	9	20		1	6	324		3	5	11		1	2	5		1	3	18
farm-ads	4143	54876	2		86.7493	544.8	85.5	264.6		3	20	101		3	20	99		3	20	99		1	16	92		3	73	192		1	1177.5	921895392		3	59	166		1	2	10		1	-	≥10000
fetal_health	2126	21	3		91.3414	233	15.6	109.5		3	11	16		3	11	16		3	11	16		0	5	14		3	38	73		1	1221	7405200		3	25	49		1	2	8		1	4	2592
german	1000	20	2		67.7	360.2	16.2	110.4		3	9	17		3	9	15		3	9	15		0	5	11		4	37	79		1	449.5	1972112		4	26	58		1	2	9		1	2	48
german_number	1000	24	3		92.8	104	11.7	43		1	1	12		1	1	12		1	1	12		1	1	9		1	1	34		1	1	1800		1	1	22		1	2	6		1	1	24
gina	3153	970	2		85.7596	337	24.1	167.9		4	12	27		4	12	26		4	12	26		0	7	19		4	54	108		1	4544	432967680		4	38	77		1	2	8		1	4	6144
gina_agnostic	3468	970	2		86.0727	372	21.9	185.1		4	13	25		4	13	25		4	13	25		0	8	19		5	57	133		1	6464	52796889600		5	41	88		1	2	9		1	4	4096
gina_prior	3468	784	2		85.6971	372.6	20.3	185.1		3	12	23		3	12	22		3	12	22		1	7	18		4	58	118		1	8871	2625793600		4	41	79		1	2	9		1	4	1152
gisette	7000	5000	2		93.2857	347.8	36	173.2		4	27	39		4	27	39		4	27	39		0	19	34		5	64	113		1	3905	234593712		5	50	81		1	2	10		1	-	≥10000
glass	214	9	6		65.0649	87	10.7	42.8		2	7	11		2	7	11		2	7	11		2	5	10		2	10	24		1	2	48		2	9	18		1	1	6		1	1	12
glass_2	214	9	2		71.9481	65	10.1	31.9		2	6	12		2	5	11		2	5	11		0	4	10		2	12	23		1	6	272		2	9	16		1	2	5		1	2	24
haberman	306	3	2		66.9462	185.4	15.5	60.8		3	8	17		3	7	13		3	7	13		0	4	11		4	19	39		1	32	2160		4	13	28		1	2	9		1	2	54
heart	303	13	2		68.6559	172.4	12	13		3	7	13		3	5	10		3	5	10		0	3	10		3	11	13		1	6	30		3	9	15		1	2	6		1	2	16
heart_c	303	13	2		73.9032	87.4	9	37.1		3	5	10		3	5	8		3	5	8		0	3	7		4	14	29		1	12	320		4	10	19		1	2	6		1	2	12
heart_h	294	13	2		73.8161	105.6	11.5	47.3		3	6	12		3	6	10		3	6	10		0	3	7		3	16	30		1	14	248		3	11	23		1	2	7		1	2	16
heart_statlog	270	13	2		75.5556	83	9.3	36.5		3	5	10		3	5	8		3	5	8		0	3	7		3	13	28		1	9	328		3	9	20		1	2	5		1	2	24
hepatitis	155	19	2		77.2083	39.6	7.4	18		2	5	9		2	5	8		2	5	8		0	3	6		2	10	18		1	8	64		2	7	10		1	2	5		1	2	32
horse	299	27	2		77.2874	66.4	10.3	32		2	6	11		2	6	9		2	6	9		0	3	8		2	12	24		1	8	90		2	8	16		1	2	6		1	2	16
hungarian	294	13	2		77.9425	103.2	11.6	45.7		2	7	12		2	6	10		2	6	10		0	4	8		3	16	36		1	15	312		3	11	25		1	2	7		1	2	18
indiansDiabetes	768	8	2		71.3602	243.4	14.5	112.7		3	7	17		3	7	14		3	7	14		0	4	12		4	26	63		1	51	202212		4	19	42		1	2	8		1	2	16
ionosphere	351	34	2		87.1905	45.6	9.6	22.3		1	6	13		1	6	12		1	6	12		0	3	12		2	12	21		1	6	48		2	9	16		1	2	8		1	2	16
iris	150	4	3		92.6667	16.2	5.4	7.4		1	3	6		1	3	5		1	3	5		1	1.5	5		1	4	8		1	1	8		1	3	6		1	1	3		1	1	4
irish	500	5	2		100	5	2	2		1	2	2		1	2	2		1	2	2		1	2	2		1	2	2		1	1	1		1	2	2		1	1	1		1	1	1
kr_vs_kp	3196	36	2		99.656	102	14.4	33.1		1	8	15		1	7	12		1	5	12		0	3	11		1	11	28		1	4	48		1	8	22		1	2	7		1	1	20
lending_loan	9578	13	2		73.4914	2610.4	33.3	1131.4		6	17	41		5	16	31		5	16	31		1	8	25		5	226	442		1	459258918095775	9.43e+29		5	157.5	311		1	3	12		1	3	192
letter	20000	16	2		99.295	317	15.8	95.9		2	6	16		2	6	15		2	6	15		0	1	12		2	49	81		1	9342.5	28391526		2	32	56		1	3	9		1	4	256
madelon	2600	500	2		75.2692	357.8	16.7	178.2		5	10	20		5	10	20		5	10	20		1	7	18		5	38	103		1	106	3221020		5	30	72		1	2	9		1	2	32
malware	6248	1084	2		99.1197	87.8	11.5	43.1		2	5	13		2	5	12		2	5	12		0	2	9		2	14	38		1	8	13080		2	10	21		1	2	7		1	1	32
meta	528	21	2		85.4354	133.6	13.2	42		2	5	17		2	4	13		2	4	12		0	1	10		2	15	30		1	21	1080		2	9	21		1	2	8		1	2	72
mnist38	13966	784	2		96.0691	506.6	27.2	251.4		4	19	28		4	19	28		4	19	28		0	8	20		7	93.5	157		1	14849376	16922386736640		6	62	107		1	3	11		1	32	3072
mnist49	13782	784	2		95.4722	539.6	28.8	267.9		5	22	31		5	22	30		5	22	30		1	9	19		7	91	166		2	7392384	715892613696000		6	61	106		1	2	12		1	-	≥10000
monk_1	601	6	2		72.5328	216.6	10.9	11		3	6	11		3	5	10		3	5	10		1	4	9		3	6	11		1	1	17		3	6	16		1	1	8		1	1	15
monk_2	556	6	2		16.539	423	10.4	12		5	8	11		2	6	10		2	5	10		0	3	10		4	10	12		1	5	24		3	8	16		1	2	7		1	2	19
monk_3	554	6	2		16.9708	429.8	10.4	11.7		4	8	11		3	6	10		3	6	10		0	3	10		4	10	12		1	6	25		3	8	16		1	2	7		1	2	25
mushroom	8124	22	2		100	38.6	7	17.2		3	6	7		3	6	6		3	6	6		1	4	6		5	8	14		1	2	20		5	7	10		1	1	4		1	1	8
new_thyroid	215	5	3		93.4848	22.6	6.2	10.8		1	5	6		1	5	6		1	5	6		0	3	5		2	8	12		1	4	32		2	6	8		1	2	3		1	2	16
nursery	12960	8	2		100	3	1	1		1	1	1		1	1	1		1	1	1		1	1	1		1	1	1		1	1	1		1	1	1		1	1	1		1	1	1
pd_speech_features	756	754	2		80.9561	87.6	15.7	43.3		2	10	21		2	9	21		2	9	21		0	6	19		3	23	45		1	18	13158		3	18	29		1	2	6		1	2	256
pendigits	10992	16	2		98.9356	186.2	12.9	90		3	6	13		3	6	11		3	6	11		0	1	9		5	32	69		1	1080	3993600		4	17	39		1	3	9		1	16	360
price_phone	2000	20	4		82.2	335.6	13.2	161.5		4	8	15		4	8	14		4	8	14		1	4	11		4	27	76		1	109.5	363828		4	19	50		1	2	7		1	2	32
primary_tumor	339	17	2		82.2906	123	12.6	22.7		3	6	14		3	5	11		3	5	11		0	2	10		3	14	20		1	10	84		3	10	16		1	2	7		1	1	21
recidivism	26020	11	2		63.4051	13828.8	27.8	147.6		5	16	25		5	14	22		5	13	22		0	6	19		6	60	98		1	10387	9734080		6	54	145		1	3	16		1	2	144
reuters	2000	249	2		91.9	193.2	26.1	89.7		3	20	28		3	20	24		3	20	24		1	9	22		3	41	72		1	3468	6209280		3	28	53		1	2	7		1	24	3456
schizo	340	14	2		76.1765	78.8	12	38		1	6	15		1	5	13		1	5	13		0	4	10		1	9	28		1	3	360		1	7	19		1	1	7		1	2	36
segment	2310	19	2		99.2641	33	6.9	16		2	3	7		2	3	6		2	3	6		1	2	6		2	8	14		1	6	48		2	5	9		1	2	5		1	2	12
seismic_pumbs	210	7	3		90	27.4	6.4	13.2		1	4	7		1	4	6		1	4	6		0	3	6		1	5	13		1	2	24		1	4	8		1	1	4		1	2	12
shuttle	58000	9	7		99.9828	66.6	9.1	32.7		3	8	10		3	8	10		3	8	10		0	3	7		3	17	27		1	36	1536		3	11	16		1	2	6		1	4	256
soybean	683	35	2		96.9267	46.2	11.6	19.3		1	3	12		1	2	9		1	2	9		0	1	8		1	8	19		1	3	60		1	5	15		1	2	6		1	1	20
spambase	4601	57	2		91.9364	536.4	30.1	264.8		3	16	32		3	15	29		3	15	29		0	9	24		3	68	146		1	15712	2535069312		3	50	107		1	2	11		1	4	384
spect	265	22	2		73.3048	108.8	13.4	20.5		2	5	14		2	4	11		2	4	11		0	2	10		4	11	19		1	7	48		2	8	15		1	2	8		1	2	24
student_mat	395	32	18		39.4936	269.6	12.6	83.3		4	8	14		4	7	14		4	7	14		3	6	13		4	10	26		1	2	40		4	9	22		1	1	5		1	1	8
student_por	649	32	17		37.7524	430.6	13.8	100.2		4	9	15		4	8	14		4	8	14		2	7	12		4	13	43		1	3	220		4	11	35		1	1	5		1	1	12
tae	151	5	2		75.5	79	11.9	37.3		3	6	13		3	5	11		3	5	11		1	3	10		3	13	25		1	8	168		3	10	16		1	2	5		1	2	36
tic_tac_toe	958	9	2		96.3476	170	9	9		3	6	9		3	5	7		3	5	7		0	3	7		3	7	9		1	3	10		3	6	11		1	1	6		1	1	10
titanic	623	4	2		75.9293	274	17.1	116.3		3	8	17		3	7	17		3	7	17		0	4	14		4	22	58		1	34	49920		4	16	38		1	2	9		1	2	96
vehicle	846	18	2		95.6247	55.4	9.7	26.7		2	5	11		2	5	11		2	5	11		0	3	9		3	12	27		1	8	720		3	8	17		1	2	6		1	2	72
vote_house_84	434	16	2		94.926	53.4	9.1	13.1		2	3	9		2	3	7		2	3	7		0	1	7		2	6	12		1	4	12		2	4.5	9		1	2	7		1	1	11
yeast	2417	116	2		97.3521	68.8	18.7	33.9		4	16	20		1	15	20		1	15	20		1	7	16		1	26	38		1	128	24576		1	18	23		1	2	5		1	8	4608

## Sheet: time
				#Sufficient				#Minimal
Dataset	%A	#N		median time	max time	#failed		median time	max time	#failed
adult	81.3583	12934		6.20474	103.686	203		5.37625	408.981	0
allBooks_baseline_DTM	72.5424	180.6		0.021323	0.034659	0		0.011368	0.344606	0
anneal	98.7753	30.8		0.000275	0.131642	0		0.001393	0.055488	0
anneal_2	99.2185	26.4		0.000224	0.047392	0		0.001235	0.053435	0
appendicitis	80	24.8		0.014987	0.016134	0		0.0012	0.004017	0
arcene	74.5	25		0.015853	0.082808	0		0.001426	0.062271	0
australian	83.913	159.8		0.0191	0.100502	0		0.008782	0.763283	0
autos	86.8571	44		0.015241	0.016629	0		0.002486	0.008476	0
backache	80.5556	46.8		0.015455	0.016791	0		0.003086	0.041913	0
balance	85.1306	209.4		0.017136	0.067998	0		0.003814	0.057085	0
bank	88.9871	5523.6		31.0441	100.643	336		0.727776	23.66	0
bank_marketing	87.3969	6656.4		6.35545	100.86	150		2.46304	123.968	0
banknote	98.6153	51		0.015834	0.069631	0		0.002936	0.070199	0
biodegradation	81.7978	221.2		0.022608	0.154778	0		0.014404	0.216673	0
biomed	90	34		0.015494	0.016662	0		0.002184	0.014723	0
breast_cancer	63.67	191.2		0.017494	0.071747	0		0.004815	0.056519	0
bupa	59.9832	147.8		0.01727	0.05658	0		0.00682	0.160818	0
car	99.0741	98		0.015659	0.106415	0		0.001529	0.047689	0
cars	92.5976	49.6		0.015645	0.097832	0		0.00238	0.048057	0
christine	63.3627	853.2		0.073269	0.157948	0		0.101339	210.554	0
cleveland_nominal	51.4839	188.4		0.016472	0.054312	0		0.00285	0.051963	0
cleveland_nominal_2	74.914	93		0.016419	0.068881	0		0.004233	0.059002	0
cnae	86.0981	276.8		0.028085	0.083372	0		0.019198	0.210835	0
colic	75.2928	101.6		0.016738	0.061909	0		0.005931	0.416493	0
compas	65.9758	1230		0.027606	0.070982	0		0.014076	0.096224	0
contraceptive	50.4399	1252.2		0.038558	0.146205	0		0.025402	0.320937	0
corral	100	27		0.000197	0.015782	0		0.000728	0.002056	0
Default_payement	66.5833	395.8		0.029755	0.146798	0		0.02246	0.444915	0
dermatology	98.6411	8.8		0.0149	0.015957	0		0.00082	0.002091	0
dexter	86.1667	72.4		0.022883	0.178563	0		0.00379	0.135888	0
divorce	97.6471	6.8		9.7e-05	0.015465	0		0.000568	0.001463	0
dorothea	92	65.2		0.064444	0.180109	0		0.006061	0.696513	0
ecoli	92.5936	44.2		0.015569	0.087589	0		0.003118	0.04845	0
farm-ads	86.7493	544.8		0.119013	0.25126	0		0.080807	1737.65	5
fetal_health	91.3414	233		0.024307	0.095198	0		0.026061	21.2134	0
german	67.7	360.2		0.027058	0.101408	0		0.016424	0.233278	0
german_number	92.8	104		0.001077	0.0212	0		0.002371	0.06796	0
gina	85.7596	337		0.034327	0.094983	0		0.040894	203.56	0
gina_agnostic	86.0727	372		0.035064	0.091142	0		0.048431	97.0667	0
gina_prior	85.6971	372.6		0.036675	0.104168	0		0.04071	14.7504	0
gisette	93.2857	347.8		0.041283	0.100047	0		0.397486	428.259	3
glass	65.0649	87		0.015775	0.052858	0		0.004301	0.053088	0
glass_2	71.9481	65		0.01574	0.071548	0		0.003997	0.050748	0
haberman	66.9462	185.4		0.017806	0.073707	0		0.0082	0.225183	0
heart	68.6559	172.4		0.016453	0.045758	0		0.002812	0.013302	0
heart_c	73.9032	87.4		0.016232	0.062318	0		0.004021	0.055057	0
heart_h	73.8161	105.6		0.016555	0.044962	0		0.006034	0.059069	0
heart_statlog	75.5556	83		0.016338	0.087789	0		0.003897	0.055522	0
hepatitis	77.2083	39.6		0.015314	0.016897	0		0.002875	0.024991	0
horse	77.2874	66.4		0.016065	0.099113	0		0.003978	0.058658	0
hungarian	77.9425	103.2		0.016537	0.027193	0		0.00615	0.060937	0
indiansDiabetes	71.3602	243.4		0.022183	0.115916	0		0.012934	0.157447	0
ionosphere	87.1905	45.6		0.015654	0.067201	0		0.002685	0.0487	0
iris	92.6667	16.2		0.000181	0.016014	0		0.000774	0.002701	0
irish	100	5		6.6e-05	8.6e-05	0		0.000402	0.000741	0
kr_vs_kp	99.656	102		0.016892	0.072055	0		0.004202	0.076642	0
lending_loan	73.4914	2610.4		0.371539	17.9797	0		0.706967	44.0844	0
letter	99.295	317		0.034813	0.115551	0		0.016809	1.15786	0
madelon	75.2692	357.8		0.032154	0.132352	0		0.024799	0.444988	0
malware	99.1197	87.8		0.018748	0.098502	0		0.00394	0.102266	0
meta	85.4354	133.6		0.017169	0.079559	0		0.004543	0.098579	0
mnist38	96.0691	506.6		0.058341	0.148961	0		0.644536	88.1792	0
mnist49	95.4722	539.6		0.059124	0.135746	0		1.29056	615.121	16
monk_1	72.5328	216.6		0.001727	0.063132	0		0.002303	0.048861	0
monk_2	16.539	423		0.017567	0.078452	0		0.004111	0.05069	0
monk_3	16.9708	429.8		0.017628	0.059665	0		0.004219	0.050176	0
mushroom	100	38.6		0.015876	0.098772	0		0.001942	0.065029	0
new_thyroid	93.4848	22.6		0.01518	0.021408	0		0.001652	0.011662	0
nursery	100	3		4.7e-05	6.9e-05	0		0.000349	0.000851	0
pd_speech_features	80.9561	87.6		0.017668	0.073691	0		0.006571	0.696163	0
pendigits	98.9356	186.2		0.022931	0.116117	0		0.04035	1.03988	0
price_phone	82.2	335.6		0.027372	0.080283	0		0.021173	0.248785	0
primary_tumor	82.2906	123		0.016406	0.084558	0		0.003086	0.055017	0
recidivism	63.4051	13828.8		0.318767	1.67452	0		0.179123	1.58206	0
reuters	91.9	193.2		0.025308	0.081728	0		0.120718	32.3934	0
schizo	76.1765	78.8		0.016178	0.019749	0		0.004195	0.055774	0
segment	99.2641	33		0.015748	0.098695	0		0.001856	0.056879	0
seismic_pumbs	90	27.4		0.015094	0.01616	0		0.001448	0.00875	0
shuttle	99.9828	66.6		0.017143	0.086901	0		0.007779	0.425909	0
soybean	96.9267	46.2		0.015763	0.087242	0		0.001905	0.05591	0
spambase	91.9364	536.4		0.049759	0.120226	0		0.091501	5.35878	0
spect	73.3048	108.8		0.016158	0.087935	0		0.002976	0.050082	0
student_mat	39.4936	269.6		0.018992	0.06108	0		0.00981	0.22422	0
student_por	37.7524	430.6		0.023373	0.064152	0		0.014114	0.340661	0
tae	75.5	79		0.015967	0.018813	0		0.004447	0.069689	0
tic_tac_toe	96.3476	170		0.016166	0.0574	0		0.001976	0.05549	0
titanic	75.9293	274		0.021621	0.04857	0		0.013967	0.599089	0
vehicle	95.6247	55.4		0.016235	0.08861	0		0.003332	0.087301	0
vote_house_84	94.926	53.4		0.015665	0.09642	0		0.001587	0.006746	0
yeast	97.3521	68.8		0.019747	0.06512	0		0.01887	34.3415	0
