# Supplementary material
Source: ML conference proceedings conference paper supplement (https://openreview.net/forum?id=n-219jrTht)
Supplement: supplementary_material [file attachment]

## 514 Proofs

### 515 Proof of Proposition 1

516 *Proof.* Let  $T$  be the complete binary tree of depth  $k$ , formed by  $n = 2^k - 1$  internal nodes and  $2^k$   
 517 leaves. We assume a breadth-first ordering of internal nodes, such that the root is labeled by  $x_1$ , the  
 518 nodes of depth 1 are labeled by  $x_2$  and  $x_3$ , and so on. Each internal node at depth  $k - 1$  from the  
 519 root of  $T$  has two children, one of it is a 0-leaf and the other one is a 1-leaf. For an arbitrary instance  
 520  $\mathbf{x} \in \{0, 1\}^n$  and any complete subtree  $T'$  of  $T$  of depth  $d$ , let  $s(\mathbf{x}, T')$  denote the set of sufficient  
 521 reasons of  $\mathbf{x}$  given  $T'$ , and let  $\sigma(\mathbf{x}, d) = |s(\mathbf{x}, T')|$  denote the number of those sufficient reasons.  
 522 We show by induction on  $d$  that:

$$\sigma(\mathbf{x}, 1) = 1 \quad (1)$$

$$\sigma(\mathbf{x}, d + 1) = \sigma(\mathbf{x}, d)(\sigma(\mathbf{x}, d) + 1) \quad (2)$$

523 For the base case (1), any complete subtree  $T'$  of  $T$  of depth  $d = 1$  has a single internal node, say  $x_i$ ,  
 524 with two leaves labeled by 0 and 1, respectively. Therefore, the unique sufficient reason for  $\mathbf{x}$  given  
 525  $T'$  is either  $x_i$  or  $\bar{x}_i$ , and hence,  $\sigma(\mathbf{x}, 1) = 1$ . Now, consider any complete subtree  $T'$  of  $T$  of depth  
 526  $d + 1$  rooted at a node  $x_i$ . Let  $T'_l(x_i)$  and  $T'_r(x_i)$  denote the subtrees of depth  $d$ , respectively rooted  
 527 at the left child of  $x_i$  and the right child of  $x_i$ . Suppose without loss of generality that the unique path  
 528 leading to  $T'(\mathbf{x}) = 1$  includes the left child of  $x_i$  (i.e.  $T'_l(\mathbf{x}) = 1$ ). By construction,

$$s(\mathbf{x}, T') = \{t_l \wedge t_r : t_l \in s(\mathbf{x}, T'_l), t_r \in s(\mathbf{x}, T'_r)\} \\ \cup \{l_i \wedge t_l : t_l \in s(\mathbf{x}, T'_l)\}$$

529 where  $l_i = \bar{x}_i$  if  $x_i = 0$  in  $\mathbf{x}$ , and  $l_i = x_i$  otherwise. Since by induction hypothesis  $s(\mathbf{x}, T'_l) =$   
 530  $s(\mathbf{x}, T'_r) = \sigma(\mathbf{x}, d)$ , it follows that  $\sigma(\mathbf{x}, d + 1) = \sigma(\mathbf{x}, d)^2 + \sigma(\mathbf{x}, d)$ . Finally, since the doubly  
 531 exponential sequence<sup>2</sup> given by  $a(1) = 1$  and  $a(d + 1) = a(d)^2 + a(d)$  satisfies  $a(d) = \lfloor c^{2^{d-1}} \rfloor$ ,  
 532 where  $c \sim 1.59791$ , it follows that  $\sigma(\mathbf{x}, k) \geq \lfloor (3/2)^{2^{k-1}} \rfloor$ . Using  $2^{k-1} = (n + 1)/2$ , we get the  
 533 desired result.  $\square$

### 534 Proof of Proposition 2

535 *Proof.* One first need the following lemma that gives a recursive characterization of the set of  
 536 sufficient reasons for an instance given a Boolean classifier:

537 **Lemma 1.** For any Boolean function  $f \in \mathcal{F}_n$  and any instance  $\mathbf{x} \in \{0, 1\}^n$ , the following inductive  
 538 characterization of  $sr(\mathbf{x}, f)$  holds:

$$\begin{aligned} sr(\mathbf{x}, 1) &= \{1\} \\ sr(\mathbf{x}, 0) &= \{\} \\ 539 \quad sr(\mathbf{x}, f) &= sr(\mathbf{x}, (f \mid \ell) \wedge (f \mid \bar{\ell})) \cup \{\ell \wedge t_\ell : t_\ell \in sr(\mathbf{x}, f \mid \ell) \text{ s.t. } t_\ell \not\models f \mid \bar{\ell}\} \\ &\quad \text{where } Var(\ell) \subseteq Var(f) \text{ and } t_x \models \ell \end{aligned}$$

and

$$sr(\mathbf{x}, (f \mid \ell) \wedge (f \mid \bar{\ell})) = \max(\{t_\ell \wedge t_{\bar{\ell}} : t_\ell \in sr(\mathbf{x}, f \mid \ell), t_{\bar{\ell}} \in sr(\mathbf{x}, f \mid \bar{\ell})\}, \models).$$

540 *Proof.* Let us recall first the following inductive characterization of  $pi(f)$ , the set of prime implicants  
 541 of  $f \in \mathcal{F}_n$ , based on the Shannon decomposition of  $f$  over any of its variables  $x$  (see e.g., [2]):

$$\begin{aligned} pi(1) &= \{1\} \\ pi(0) &= \{\} \\ 542 \quad pi(f) &= pi((f \mid \bar{x}) \wedge (f \mid x)) \\ &\quad \cup \{\bar{x} \wedge t_{\bar{x}} : t_{\bar{x}} \in pi(f \mid \bar{x}) \text{ s.t. } \nexists t \in pi((f \mid \bar{x}) \wedge (f \mid x)), t_{\bar{x}} \models t\} \\ &\quad \cup \{x \wedge t_x : t_x \in pi(f \mid x) \text{ s.t. } \nexists t \in pi((f \mid \bar{x}) \wedge (f \mid x)), t_x \models t\} \\ &\quad \text{where } x \in Var(f) \end{aligned}$$

and

$$pi((f \mid \bar{x}) \wedge (f \mid x)) = \max(\{t_{\bar{x}} \wedge t_x : t_{\bar{x}} \in pi(f \mid \bar{x}), t_x \in pi(f \mid x)\}, \models).$$

<sup>2</sup>See <https://oeis.org/A007018>.

543 For the base cases  $sr(\mathbf{x}, 1) = \{1\}$  and  $sr(\mathbf{x}, 0) = \{\}$ , the result is obvious. For the general case,  
 544 taking  $x \in Var(\ell)$ , we have:

$$\begin{aligned}
 sr(\mathbf{x}, f) &= \{t \in pi(f) : t_{\mathbf{x}} \models t\} \\
 &= \{t \in pi((f \mid \bar{x}) \wedge (f \mid x)) : t_{\mathbf{x}} \models t\} \\
 &\cup \{t \in \{\bar{x} \wedge t_{\bar{x}} : t_{\bar{x}} \in pi(f \mid \bar{x}) \text{ s.t. } \nexists t' \in pi((f \mid \bar{x}) \wedge (f \mid x)), t_{\bar{x}} \models t'\}, \text{ and } t_{\mathbf{x}} \models t\} \\
 545 &\cup \{t \in \{x \wedge t_x : t_x \in pi(f \mid x) \text{ s.t. } \nexists t' \in pi((f \mid \bar{x}) \wedge (f \mid x)), t_x \models t'\}, \text{ and } t_{\mathbf{x}} \models t\} \\
 &= sr(\mathbf{x}, (f \mid \bar{x}) \wedge (f \mid x)) \\
 &\cup \{t \in \{\bar{x} \wedge t_{\bar{x}} : t_{\bar{x}} \in pi(f \mid \bar{x}) \text{ s.t. } \nexists t' \in pi((f \mid \bar{x}) \wedge (f \mid x)), t_{\bar{x}} \models t'\}, \text{ and } t_{\mathbf{x}} \models t\} \\
 &\cup \{t \in \{x \wedge t_x : t_x \in pi(f \mid x) \text{ s.t. } \nexists t' \in pi((f \mid \bar{x}) \wedge (f \mid x)), t_x \models t'\}, \text{ and } t_{\mathbf{x}} \models t\}
 \end{aligned}$$

546 Now, since  $\mathbf{x}$  is an instance, whatever  $\ell$ , it cannot be the case that  $t_{\mathbf{x}} \models \ell$  and  $t_{\mathbf{x}} \models \bar{\ell}$ . Suppose that  
 547  $\ell = x$  (the case  $\ell = \bar{x}$  is similar). In this situation, no element of  $\{\bar{x} \wedge t_{\bar{x}} : t_{\bar{x}} \in pi(f \mid \bar{x}) \text{ s.t. } \nexists t \in$   
 548  $pi((f \mid \bar{x}) \wedge (f \mid x)), t_{\bar{x}} \models t\}$ , and  $t_{\mathbf{x}} \models t\}$  can belong to  $sr(\mathbf{x}, f)$ . As a consequence, we get that:

$$\begin{aligned}
 sr(\mathbf{x}, f) &= sr(\mathbf{x}, (f \mid \bar{x}) \wedge (f \mid x)) \\
 549 &\cup \{t \in \{\ell \wedge t_{\ell} : t_{\ell} \in pi(f \mid \ell) \text{ s.t. } \nexists t' \in pi((f \mid \bar{\ell}) \wedge (f \mid \ell)), t_{\ell} \models t'\}, \text{ and } t_{\mathbf{x}} \models t\} \\
 &\text{where } Var(\ell) \subseteq Var(f) \text{ and } t_{\mathbf{x}} \models \ell
 \end{aligned}$$

550 If  $t = \ell \wedge t_{\ell}$  is such that  $t_{\mathbf{x}} \models t$  holds, then we have  $t_{\mathbf{x}} \models t_{\ell}$ . Hence, we have:

$$\begin{aligned}
 sr(\mathbf{x}, f) &= sr(\mathbf{x}, (f \mid \bar{x}) \wedge (f \mid x)) \\
 551 &\cup \{\ell \wedge t_{\ell} : t_{\ell} \in sr(\mathbf{x}, f \mid \ell) \text{ s.t. } \nexists t' \in pi((f \mid \bar{\ell}) \wedge (f \mid \ell)), t_{\ell} \models t'\} \\
 &\text{where } Var(\ell) \subseteq Var(f) \text{ and } t_{\mathbf{x}} \models \ell
 \end{aligned}$$

552 Consider now the condition  $\exists t' \in pi((f \mid \bar{\ell}) \wedge (f \mid \ell)), t_{\ell} \models t'$  and suppose that it is satisfied. Since  
 553  $pi((f \mid \bar{\ell}) \wedge (f \mid \ell)) = max(\{t'_{\bar{\ell}} \wedge t'_{\ell} : t'_{\bar{\ell}} \in pi(f \mid \bar{\ell}), t'_{\ell} \in pi(f \mid \ell)\}, \models)$ , there exist  $t'_{\bar{\ell}} \in pi(f \mid \bar{\ell})$   
 554 and  $t'_{\ell} \in pi(f \mid \ell)$  such that  $t' = t'_{\bar{\ell}} \wedge t'_{\ell}$ . Thus, we have  $t_{\ell} \models t'_{\bar{\ell}} \wedge t'_{\ell}$ , and in particular  $t_{\ell} \models t'_{\ell}$  holds.  
 555 But since  $t_{\ell}$  and  $t'_{\ell}$  are prime implicants of  $f \mid \ell$ , this implies that  $t_{\ell} \equiv t'_{\ell}$  holds. Furthermore, from  
 556  $t_{\ell} \models t'_{\bar{\ell}} \wedge t'_{\ell}$  we get that  $t_{\ell} \models t'_{\bar{\ell}}$ . In addition, a prime implicant  $t'_{\bar{\ell}}$  of  $f \mid \bar{\ell}$  such that  $t_{\ell} \models t'_{\bar{\ell}}$  exists if  
 557 and only if  $t_{\ell} \models f \mid \bar{\ell}$ . Altogether, the condition  $\exists t' \in pi((f \mid \bar{\ell}) \wedge (f \mid \ell)), t_{\ell} \models t'$  is equivalent to  
 558  $t_{\ell} \models f \mid \bar{\ell}$ . Thus, we get that:

$$\begin{aligned}
 sr(\mathbf{x}, f) &= sr(\mathbf{x}, (f \mid \ell) \wedge (f \mid \bar{\ell})) \\
 559 &\cup \{\ell \wedge t_{\ell} : t_{\ell} \in sr(\mathbf{x}, f \mid \ell) \text{ s.t. } t_{\ell} \not\models f \mid \bar{\ell}\} \\
 &\text{where } Var(\ell) \subseteq Var(f) \text{ and } t_{\mathbf{x}} \models \ell
 \end{aligned}$$

560 Finally, if  $t \in max(\{t_{\bar{x}} \wedge t_x : t_{\bar{x}} \in pi(f \mid \bar{x}), t_x \in pi(f \mid x)\}, \models)$ , then by construction  $t$  is  
 561 such that there exist  $t_{\bar{x}} \in pi(f \mid \bar{x})$  and  $t_x \in pi(f \mid x)$  satisfying  $t = t_{\bar{x}} \wedge t_x$ . If  $t_{\mathbf{x}} \models t$  holds,  
 562 then  $t_{\mathbf{x}} \models t_{\bar{x}}$  and  $t_{\mathbf{x}} \models t_x$  hold. Hence  $t_{\bar{x}} \in sr(\mathbf{x}, f \mid \bar{x})$  and  $t_x \in sr(\mathbf{x}, f \mid x)$ . Consequently,  
 563  $t \in max(\{t_{\bar{x}} \wedge t_x : t_{\bar{x}} \in sr(\mathbf{x}, f \mid \bar{x}), t_x \in sr(\mathbf{x}, f \mid x)\}, \models)$ .  $\square$

564 From the inductive characterization of  $sr(\mathbf{x}, f)$  given by the previous proposition, we can easily  
 565 derive a bottom-up algorithm allowing to derive  $sr(\mathbf{x}, f)$  when  $f$  is represented by a decision tree.

566 Consider now a decision tree  $T$  of depth  $k \geq 1$  having the following form:

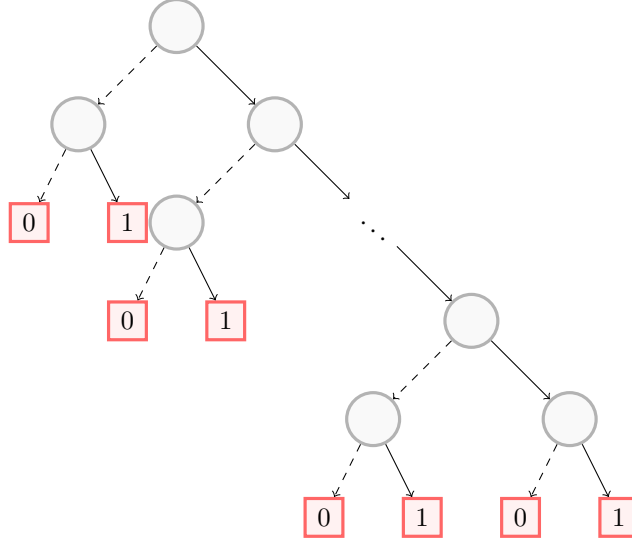

567

568  $T$  has  $2k - 1$  decision nodes and  $2k$  leaves. Suppose that the variables associated with the decision  
 569 nodes are in one-to-one correspondence with the decision nodes (i.e., they are all distinct). The  
 570 number of variables occurring in  $T$  is thus  $n = 2k - 1$ , therefore  $T$  has  $2n + 1$  nodes. Consider now  
 571 the instance  $\mathbf{x} \in \{0, 1\}^n$  such that  $x_i = 1$  for every  $i \in [n]$ . We are going to prove by induction on  
 572 the depth  $k$  of such a tree  $T$  that  $\mathbf{x}$  has  $2^{k-1}$  minimal reasons given  $T$ , each of them containing  $k$   
 573 literals. The proof takes advantage of the recursive characterization of the set of all sufficient reasons  
 574 for an instance given a decision tree, as made precise by Lemma 1.

- 575 • Base case  $k = 1$ . We have  $n = 1$ .  $T$  consists of a decision node labelled by the single  
 576 variable of  $X_n$ , say  $x$ , a left child that is a 0-leaf and a right child that is a 1-leaf.  $T$  is  
 577 equivalent to  $x$  and  $x$  is implied by  $t_{\mathbf{x}}$ . Hence,  $x$  is the unique sufficient reason for  $\mathbf{x}$  given  $T$ ,  
 578 so it is also the unique minimal reason for  $\mathbf{x}$  given  $T$ . As expected, the number of minimal  
 579 reasons for  $\mathbf{x}$  given  $T$  is equal to  $2^{k-1}$ . The size of the unique minimal reason is  $k = 1$ .
- 580 • Inductive step  $k > 1$ . Let  $x$  be the variable of  $X_n$  labelling the root node of  $T$ . By  
 581 construction, the left child  $T_l$  of  $T$  is equivalent to a single variable, say  $x_l$ , that is the unique  
 582 minimal reason for  $\mathbf{x}$  given  $T_l$ . The right child  $T_r$  of  $T$  has the same form as  $T$ , but with  
 583 depth  $k - 1$ . By induction hypothesis, we know that  $\mathbf{x}$  has  $2^{k-2}$  minimal reasons given  $T_r$ ,  
 584 each of them containing  $k - 1$  literals. As shown by Lemma 1, provided that the variables  
 585 labelling the decision nodes are pairwise distinct, the minimal reasons for  $\mathbf{x}$  given  $T$  are  
 586 obtained by extending every minimal reason for  $\mathbf{x}$  given  $T_r$  with  $x_l$  and by extending every  
 587 minimal reason for  $\mathbf{x}$  given  $T_r$  with  $x$ . Accordingly,  $\mathbf{x}$  has  $2 \times (2^{k-2}) = 2^{k-1}$  minimal  
 588 reasons given  $T$  and each of them contains  $k - 1 + 1 = k$  literals.

589 Finally, since  $n = 2k - 1$ , we have  $k = \frac{n+1}{2}$  and the number of minimal reasons for  $\mathbf{x}$  given  $T$  is  
 590 equal to  $2^{k-1} = 2^{\frac{n-1}{2}}$ . □

### 591 Proof of Proposition 3

592 *Proof.* The algorithms to compute  $Nec_s(\mathbf{x}, T)$ ,  $Rel_s(\mathbf{x}, T)$ , and  $Irr_s(\mathbf{x}, T)$  are as follows: first  
 593 compute  $CNF(T)$  and then remove from this set of clauses every literal that does not belong to  $t_{\mathbf{x}}$ .  
 594 This can be done in  $\mathcal{O}(n|T|)$  time. By construction, the resulting CNF formula  $f$  is monotone: every  
 595 literal in it occurs with the same polarity as the one it has in  $t_{\mathbf{x}}$ . Furthermore, the size of  $f$  cannot  
 596 exceed the size of  $CNF(T)$ , thus the size of  $T$ .

597 Since  $f$  is a monotone CNF formula, its prime implicants can be computed by removing from  $f$  every  
 598 clause that is a strict superset of another clause of  $f$ . This can be achieved in quadratic time in the size  
 599 of  $f$ , thus in the size of  $T$ . Let  $g$  be the resulting formula in prime implicants form and equivalent to  
 600  $f$ .  $g$  is equivalent to the complete reason for  $\mathbf{x}$  given  $T$ . Since it is in prime implicants form,  $g$  is

601 Lit-dependent on every literal occurring in it (i.e.,  $g$  is Lit-simplified, see Proposition 8 in [23] for  
602 details), hence so is the complete reason for  $x$  given  $T$ .

603 This means that for every literal  $\ell$  occurring in  $g$ , there exists a sufficient reason for  $x$  given  $T$  that  
604 contains  $\ell$ , so that  $Rel_s(x, T)$  is the set of literals occurring in  $g$  and  $Irr_s(x, T)$  is the complement  
605 of  $Rel_s(x, T)$  in the set of all literals over  $X_n$ . Finally, since by definition the literals of  $Nec_s(x, T)$   
606 must belong to every sufficient reason for  $x$  given  $T$ , they are given by the unit clauses that belong to  
607  $g$ .  $\square$

#### 608 **Proof of Proposition 4**

609 *Proof.* We call MINIMAL REASON the problem that asks, given  $T \in \text{DT}_n$ ,  $x \in \{0, 1\}^n$  with  
610  $T(x) = 1$  and  $k \in \mathbb{N}$ , whether there is an implicant  $t$  of  $T$  of size at most  $k$  that covers  $x$ .

611 Our objective is to prove that MINIMAL REASON is NP-hard. To this end, let us first recall that  
612 a *vertex cover* of an undirected graph  $G = (X, E)$  is a subset  $V \subseteq X$  of vertices such that  
613  $\{y, z\} \cap V \neq \emptyset$  for every edge  $e = \{y, z\}$  in  $E$ . In the MIN VERTEX COVER problem, we are given  
614 a graph  $G$  together with an integer  $k \in \mathbb{N}$ , and the task is to find a vertex cover  $V$  of  $G$  of size at most  
615  $k$ . MIN VERTEX COVER is a well-known NP-hard problem [20], and we now show that it can be  
616 reduced in polynomial time to MINIMAL REASON.

617 Suppose that we are given a graph  $G = (X, E)$  and assume, without loss of generality, that  $G$  does  
618 not include isolated vertices. For any  $y \in X$ , let  $E_y = \{e \in E : y \in e\}$  denote the set of edges in  
619  $G$  that are adjacent to  $y$ , and let  $N_y = \{z \in X : \{y, z\} \in E\}$  denote the set of neighbors of  $y$  in  
620  $G$ . By  $G \setminus y$ , we denote the deletion of  $y$  from  $G$ , obtained by removing  $y$  and its adjacent edges,  
621 i.e.,  $G \setminus y = (X \setminus \{y\}, E \setminus E_y)$ . We associate with  $G$  a decision tree  $T(G)$  over  $X_n = X$  using the  
622 following recursive algorithm. If  $G$  is the empty graph (i.e.  $E = \emptyset$ ), then return the decision tree  
623 rooted at a 1-leaf. Otherwise, pick a node  $y \in X$  and generate a decision tree  $T(G)$  such that:

- 624 (1) the root is labeled by  $y$ ;
- 625 (2) the left child is the decision tree encoding the monomial  $\bigwedge N_y$ ;
- 626 (3) the right child is the decision tree  $T(G')$  returned by calling the algorithm on  $G' = G \setminus y$ .

627 By construction,  $T(G)$  is a complete backtrack search tree of the formula  $\text{CNF}(E) = \bigwedge \{(y \vee z) :$   
628  $\{y, z\} \in E\}$ , which implies that  $T(G)$  and  $\text{CNF}(E)$  are logically equivalent. Furthermore,  $T(G)$  is a  
629 comb-shaped tree since recursion only on the rightmost branch. In particular, the algorithm runs in  
630  $\mathcal{O}(n|E|)$  time, since step (1) takes  $\mathcal{O}(1)$  time, step (2) takes  $\mathcal{O}(n)$  time, and step (3) is called at most  
631  $|E|$  times.

632 Now, with an instance  $P_1 = (G, k)$  of MIN VERTEX COVER, we associate the instance  $P_2 =$   
633  $(T(G), x, k)$  of MINIMAL REASON, where  $x = (1, \dots, 1)$ . Based on the above algorithm,  $P_2$  can  
634 be constructed in time polynomial in the size of  $P_1$ .

635 Let  $V$  be a solution of  $P_1$ . Since  $V$  is a vertex cover of  $G$ , the term  $t_V = \bigwedge V$  is an implicant of the  
636 formula  $\text{CNF}(E)$ . Since  $t_V \subseteq t_x$  and  $|t_V| \leq k$ , it follows from the fact that  $\text{CNF}(E)$  and  $T(G)$  are  
637 logically equivalent that  $t_V$  is a solution of  $P_2$ .

638 Conversely, let  $t$  be a solution of  $P_2$ . Since  $t$  is an implicant of  $T(G)$ , it follows that  $t$  is an implicant  
639 of  $\text{CNF}(E)$ . This together with the fact that  $t \subseteq t_x$  implies that the subset of vertices  $V \subseteq X_n$ ,  
640 satisfying  $\bigwedge V = t$ , is a vertex cover of  $G$ . Since  $|V| \leq k$ , it is therefore a solution of  $P_1$ .  $\square$

#### 642 **Proof of Proposition 5**

643 *Proof.* Let  $x^*$  be any solution of  $(C_{\text{soft}}, C_{\text{hard}})$ . Observe that the set of all hard clauses  $c \cap t_x$  (where  
644  $c$  is a clause of  $\text{CNF}(T)$ ) corresponds to a *monotone* CNF formula. Therefore, in order to satisfy such  
645 a clause  $c \cap t_x$ ,  $x^*$  must set a literal  $\ell$  of  $t_x$  to 1. Thus,  $x^*$  satisfies all the hard clauses of  $C_{\text{hard}}$  if  
646 and only if the term consisting of the literals that are shared by  $t_x = \bigwedge_{i=1}^n \ell_i$  and  $t_{x^*}$  is an implicant  
647 of  $T$  and is implied by  $x$ .

648 The soft clauses of  $C_{\text{soft}}$  are used to select among the assignments that satisfy all the hard clauses,  
 649 the ones that correspond to minimal sufficient reasons. Soft clauses are given by literals  $\ell_i$ , which  
 650 are precisely the complementary literals to those occurring in  $t_x$ . Having a soft clause  $\ell_i$  violated by  
 651  $x^*$  means that the literal  $\bar{\ell}$  of  $t_x$  is necessary to get an implicant of  $T$  given the assignment of the  
 652 other variables in  $x^*$ . Whenever a soft clause  $\ell_i$  is violated by  $x^*$  a penalty of 1 incurs. This ensures  
 653 that the term consisting of the literals that are shared by  $t_x = \bigwedge_{i=1}^n \ell_i$  and  $t_{x^*}$  is a minimal sufficient  
 654 reason for  $x$  given  $T$ .  $\square$

## 655 Proof of Proposition 6

656 *Proof.* By definition, the sufficient reasons  $t$  for  $x$  given  $f$  are the prime implicants of  $f$  that covers  
 657  $x$ . Thus, they are precisely the prime implicants of the (conjunctively-interpreted) set of clauses  
 658  $\{c \cap t_x : c \in \text{CNF}(f)\}$  where  $\text{CNF}(f)$  is any CNF formula equivalent to  $f$ . Furthermore, the complete  
 659 reason for  $x$  given  $f$  (equivalent to the disjunction of all the sufficient reasons for  $x$  given  $f$  [8]) is  
 660 a monotone Boolean function because every sufficient reason covers  $x$  which assigns in a unique  
 661 way every variable from  $X_n$ . The prime implicants of such a monotone function are precisely the  
 662 minimal hitting sets of the prime implicants of the function. Because of the minimal hitting set  
 663 duality between sufficient reasons and contrastive explanations for  $x$  given  $f$  [16], the contrastive  
 664 explanations for  $x$  given  $f$  are thus the sets of literals corresponding to the prime implicants of  
 665  $\{c \cap t_x : c \in \text{CNF}(f)\}$ . Now, since the (conjunctively-interpreted) set of clauses  $\{c \cap t_x : c \in \text{CNF}(f)\}$   
 666 is equivalent to the complete reason for  $x$  given  $f$ , it is a monotone function, and as a consequence,  
 667 its prime implicants are its minimal elements w.r.t.  $\subseteq$ . This comes from the correctness of any  
 668 resolution-based algorithm for generating prime implicants (see e.g., [26]). Finally, when  $f$  is a  
 669 decision tree  $T$ ,  $\{c \cap t_x : c \in \text{CNF}(T)\}$  can be computed in time polynomial in  $n + |T|$  because  
 670  $\text{CNF}(T)$  can be computed in time linear in  $|T|$ . Using an extra quadratic time in the size of this  
 671 set  $\{c \cap t_x : c \in \text{CNF}(T)\}$ , its minimal elements w.r.t.  $\subseteq$  can be selected. The resulting set is by  
 672 construction the set of all the contrastive explanations for  $x$  given  $T$ , and this set has been computed  
 673 in time polynomial in  $n + |T|$ .  $\square$
