# Supplementary material
Source: ML conference proceedings conference paper supplement (https://openreview.net/forum?id=n-219jrTht)
Supplement: supplementary_material [file attachment]

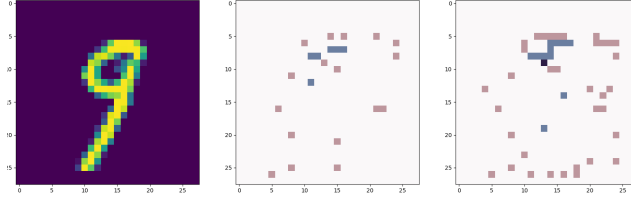

Figure 3: Two sufficient reasons for an `mnist49` instance (on the left). This instance has 21 621 841 920 sufficient reasons. Blue (resp. red) dots correspond to pixels on (resp. off).

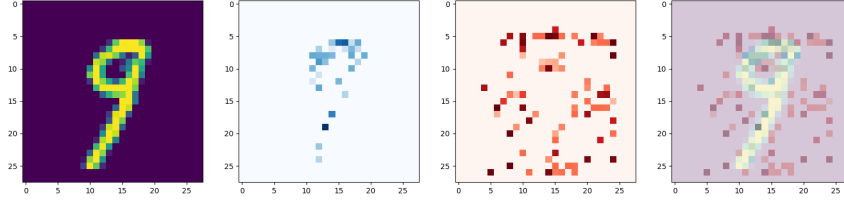

Figure 4: The heat map related to the instance of Figure 3. Red (resp. blue) dots correspond to pixels on (resp. off). The intensity of the color reflects the explanatory importance of the corresponding feature. The leftmost picture gives the instance, the next one focuses on pixels that are on, the third one to pixels off, and the last one is an overlay of the first three.

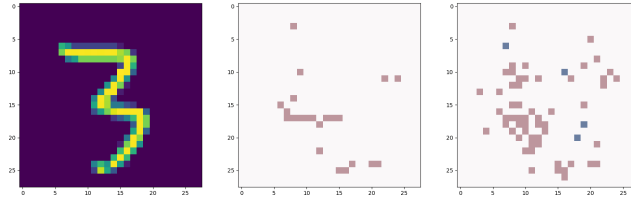

Figure 5: Two sufficient reasons for a `mnist38` instance (on the left). This instance has 135 727 104 sufficient reasons. Blue (resp. red) dots correspond to pixels on (resp. off).

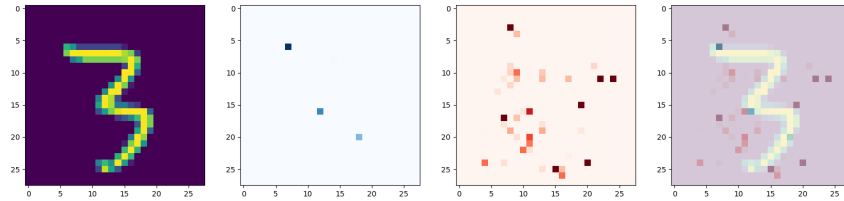

Figure 6: The heat map related to the instance of Figure 5. Red (resp. blue) dots correspond to pixels on (resp. off). The intensity of the color reflects the explanatory importance of the corresponding feature. The leftmost picture gives the instance, the next one focuses on pixels that are on, the third one to pixels off, and the last one is an overlay of the first three.

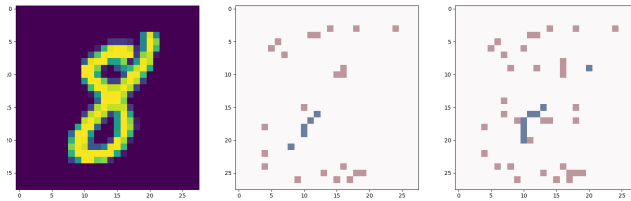

Figure 7: Two sufficient reasons for a `mnist38` instance (on the left). This instance has 29 952 sufficient reasons. Blue (resp. red) dots correspond to pixels on (resp. off).

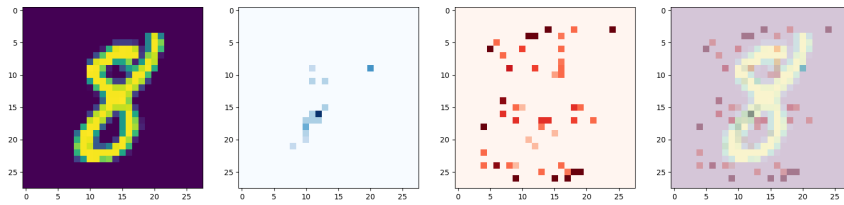

Figure 8: The heat map related to the instance of Figure 7. Red (resp. blue) dots correspond to pixels on (resp. off). The intensity of the color reflects the explanatory importance of the corresponding feature. The leftmost picture gives the instance, the next one focuses on pixels that are on, the third one to pixels off, and the last one is an overlay of the first three.
